# Supplementary material for: Combination effect of ligands and ionic liquid components on the structure and properties of manganese metal–organic frameworks
Source: Royal Society of Chemistry journal article supplement (doi:10.1039/c7ce01216k), 2017-01-01
Supplement: c7ce01216k1.pdf [file c7ce01216k1.pdf]

## Combination effect of ligands and ionic liquid components on the structure and properties in manganese metal–organic frameworks

Zhen Wei<sup>a,b</sup>, Ling Xu<sup>a\*</sup>, Bing Liu<sup>c\*</sup>, Huan Jiao<sup>a</sup>

Table S1. Crystal and structure refinement data for compounds 1-5

|                                             | 1                                                                                              | 2                                                                                              | 3                                                                                              | 4                                                                                              | 5                                                                                              |
|---------------------------------------------|------------------------------------------------------------------------------------------------|------------------------------------------------------------------------------------------------|------------------------------------------------------------------------------------------------|------------------------------------------------------------------------------------------------|------------------------------------------------------------------------------------------------|
| Empirical formula                           | C <sub>38</sub> H <sub>38</sub> Cl <sub>2</sub> Mn <sub>3</sub> N <sub>4</sub> O <sub>12</sub> | C <sub>40</sub> H <sub>42</sub> Cl <sub>2</sub> Mn <sub>3</sub> N <sub>4</sub> O <sub>12</sub> | C <sub>38</sub> H <sub>38</sub> Br <sub>2</sub> Mn <sub>3</sub> N <sub>4</sub> O <sub>12</sub> | C <sub>40</sub> H <sub>42</sub> Br <sub>2</sub> Mn <sub>3</sub> N <sub>4</sub> O <sub>12</sub> | C <sub>42</sub> H <sub>46</sub> Br <sub>2</sub> Mn <sub>3</sub> N <sub>4</sub> O <sub>12</sub> |
| Formula weight                              | 978.44                                                                                         | 1006.50                                                                                        | 1067.36                                                                                        | 1095.42                                                                                        | 1123.47                                                                                        |
| Crystal system                              | monoclinic                                                                                     | monoclinic                                                                                     | monoclinic                                                                                     | monoclinic                                                                                     | monoclinic                                                                                     |
| Space group                                 | <i>P</i> 2 <sub>1</sub> / <i>n</i>                                                             | <i>P</i> 2 <sub>1</sub> / <i>c</i>                                                             | <i>P</i> 2 <sub>1</sub> / <i>n</i>                                                             | <i>P</i> 2 <sub>1</sub> / <i>c</i>                                                             | <i>P</i> 2 <sub>1</sub> / <i>c</i>                                                             |
| <i>a</i> /Å                                 | 13.2885(3)                                                                                     | 13.5591(3)                                                                                     | 13.5252(8)                                                                                     | 13.7103(3)                                                                                     | 13.8296(4)                                                                                     |
| <i>b</i> /Å                                 | 9.6523(2)                                                                                      | 10.4987(2)                                                                                     | 9.6460(5)                                                                                      | 10.5170(2)                                                                                     | 10.4308(3)                                                                                     |
| <i>c</i> /Å                                 | 18.1669(5)                                                                                     | 16.6622(5)                                                                                     | 18.4119(12)                                                                                    | 16.7248(4)                                                                                     | 17.0480(8)                                                                                     |
| β/°                                         | 109.574(3)                                                                                     | 110.430(3)                                                                                     | 110.747(7)                                                                                     | 110.262(3)                                                                                     | 109.760(4)                                                                                     |
| <i>V</i> /Å <sup>3</sup>                    | 2195.51(9)                                                                                     | 2222.72(9)                                                                                     | 2246.3(2)                                                                                      | 2262.34(9)                                                                                     | 2314.43(14)                                                                                    |
| <i>Z</i>                                    | 2                                                                                              | 2                                                                                              | 2                                                                                              | 2                                                                                              | 2                                                                                              |
| ρ <sub>calc</sub> g/cm <sup>3</sup>         | 1.480                                                                                          | 1.504                                                                                          | 1.578                                                                                          | 1.608                                                                                          | 1.612                                                                                          |
| μ/mm <sup>-1</sup>                          | 1.033                                                                                          | 1.023                                                                                          | 2.670                                                                                          | 2.653                                                                                          | 2.596                                                                                          |
| <i>F</i> (000)                              | 998.0                                                                                          | 1030.0                                                                                         | 1070.0                                                                                         | 1102.0                                                                                         | 1632.0                                                                                         |
| Crystal size/mm <sup>3</sup>                | 0.3×0.2×0.05                                                                                   | 0.2×0.15×0.08                                                                                  | 0.4×0.4×0.2                                                                                    | 0.12×0.08×0.04                                                                                 | 0.2×0.1×0.1                                                                                    |
| 2θ range/°                                  | 7.44 to 50.04                                                                                  | 6.4 to 50                                                                                      | 7.36 to 50.06                                                                                  | 7.1 to 50.04                                                                                   | 7.38 to 50.02                                                                                  |
| Reflections collected                       | 20852                                                                                          | 20837                                                                                          | 11164                                                                                          | 17334                                                                                          | 9636                                                                                           |
| Independent reflections                     | 3859 [R <sub>int</sub> = 0.0310, R <sub>sigma</sub> = 0.0229]                                  | 3882 [R <sub>int</sub> = 0.0293, R <sub>sigma</sub> = 0.0219]                                  | 3923 [R <sub>int</sub> = 0.0304, R <sub>sigma</sub> = 0.0349]                                  | 3970 [R <sub>int</sub> = 0.0259, R <sub>sigma</sub> = 0.0223]                                  | 4076 [R <sub>int</sub> = 0.0271, R <sub>sigma</sub> = 0.0367]                                  |
| GOF                                         | 1.026                                                                                          | 1.013                                                                                          | 1.013                                                                                          | 1.025                                                                                          | 1.024                                                                                          |
| Final R indexes [I ≥ 2σ(I)]                 | R <sub>1</sub> = 0.0370, wR <sub>2</sub> = 0.1070                                              | R <sub>1</sub> = 0.0378, wR <sub>2</sub> = 0.1201                                              | R <sub>1</sub> = 0.0440, wR <sub>2</sub> = 0.1118                                              | R <sub>1</sub> = 0.0315, wR <sub>2</sub> = 0.0787                                              | R <sub>1</sub> = 0.0371, wR <sub>2</sub> = 0.0907                                              |
| Final R indexes [all data]                  | R <sub>1</sub> = 0.0452, wR <sub>2</sub> = 0.1129                                              | R <sub>1</sub> = 0.0475, wR <sub>2</sub> = 0.1275                                              | R <sub>1</sub> = 0.0609, wR <sub>2</sub> = 0.1242                                              | R <sub>1</sub> = 0.0422, wR <sub>2</sub> = 0.0848                                              | R <sub>1</sub> = 0.0569, wR <sub>2</sub> = 0.1001                                              |
| Largest diff. peak/hole / e Å <sup>-3</sup> | 0.76/-0.39                                                                                     | 0.95/-0.54                                                                                     | 1.03/-0.54                                                                                     | 0.59/-0.44                                                                                     | 0.58/-0.36                                                                                     |

$$R_1 = (\sum |F_o| - |F_c|) / \sum |F_o|, wR_2 = [\sum (w(F_o^2 - F_c^2)^2) / \sum (w|F_o^2|)]^{1/2}$$

Table S2. Crystal and structure refinement data for compounds **6-9** and **11**.

|                                             | <b>6</b>                                                                       | <b>7</b>                                                                       | <b>8</b>                                                                       | <b>9</b>                                                                       | <b>11</b>                                                                         |
|---------------------------------------------|--------------------------------------------------------------------------------|--------------------------------------------------------------------------------|--------------------------------------------------------------------------------|--------------------------------------------------------------------------------|-----------------------------------------------------------------------------------|
| Empirical formula                           | C <sub>68</sub> H <sub>54</sub> Mn <sub>3</sub> N <sub>4</sub> O <sub>16</sub> | C <sub>55</sub> H <sub>45</sub> Mn <sub>2</sub> N <sub>6</sub> O <sub>15</sub> | C <sub>58</sub> H <sub>24</sub> Mn <sub>2</sub> N <sub>6</sub> O <sub>15</sub> | C <sub>61</sub> H <sub>26</sub> Mn <sub>2</sub> N <sub>6</sub> O <sub>15</sub> | C <sub>209</sub> H <sub>170</sub> Mn <sub>9</sub> N <sub>12</sub> O <sub>54</sub> |
| Formula weight                              | 1347.97                                                                        | 1139.85                                                                        | 1154.71                                                                        | 1192.76                                                                        | 4208.03                                                                           |
| Temperature/K                               | 152.99                                                                         | 293(2)                                                                         | 293(2)                                                                         | 293(2)                                                                         | 153.01                                                                            |
| Crystal system                              | monoclinic                                                                     | monoclinic                                                                     | monoclinic                                                                     | monoclinic                                                                     | triclinic                                                                         |
| Space group                                 | C2/c                                                                           | C2/m                                                                           | C2/m                                                                           | C2/m                                                                           | P-1                                                                               |
| a/Å                                         | 18.2308(7)                                                                     | 18.1886(10)                                                                    | 18.1583(12)                                                                    | 18.2596(9)                                                                     | 13.5482(4)                                                                        |
| b/Å                                         | 17.8579(6)                                                                     | 21.2528(9)                                                                     | 21.2584(12)                                                                    | 21.4975(8)                                                                     | 15.5614(5)                                                                        |
| c/Å                                         | 18.6949(6)                                                                     | 16.2865(7)                                                                     | 16.2295(8)                                                                     | 16.3016(6)                                                                     | 27.8886(9)                                                                        |
| α/°                                         | 90.00                                                                          | 90.00                                                                          | 90.00                                                                          | 90.00                                                                          | 102.9370(10)                                                                      |
| β/°                                         | 95.9480(10)                                                                    | 118.757(5)                                                                     | 118.484(6)                                                                     | 118.718(4)                                                                     | 92.1900(10)                                                                       |
| γ/°                                         | 90.00                                                                          | 90.00                                                                          | 90.00                                                                          | 90.00                                                                          | 112.3730(10)                                                                      |
| V/Å <sup>3</sup>                            | 6053.6(4)                                                                      | 5519.2(5)                                                                      | 5506.5(6)                                                                      | 5611.9(4)                                                                      | 5249.2(3)                                                                         |
| Z                                           | 4                                                                              | 4                                                                              | 4                                                                              | 4                                                                              | 1                                                                                 |
| ρ <sub>calc</sub> g/cm <sup>3</sup>         | 1.479                                                                          | 1.372                                                                          | 1.393                                                                          | 1.412                                                                          | 1.331                                                                             |
| μ/mm <sup>-1</sup>                          | 0.692                                                                          | 0.529                                                                          | 0.532                                                                          | 0.525                                                                          | 0.604                                                                             |
| F(000)                                      | 2772.0                                                                         | 2348.0                                                                         | 2336.0                                                                         | 2416.0                                                                         | 2165.0                                                                            |
| Crystal size/mm <sup>3</sup>                | 0.50×0.40×0.30                                                                 | 0.30×0.20×0.05                                                                 | 0.20×0.20×0.10                                                                 | 0.4×0.2×0.1                                                                    | 0.200×0.150×0.10                                                                  |
| 2θ range for data collection/°              | 8.56 to 50.06                                                                  | 8.18 to 50.04                                                                  | 6.94 to 50.04                                                                  | 7.56 to 50.06                                                                  | 6.8 to 50.06                                                                      |
| Reflections collected                       | 49458                                                                          | 26303                                                                          | 25999                                                                          | 26315                                                                          | 179532                                                                            |
| Independent reflections                     | 5304[R <sub>int</sub> =0.0365, R <sub>sigma</sub> =0.0163]                     | 4974[R <sub>int</sub> =0.0509, R <sub>sigma</sub> =0.0398]                     | 4979[R <sub>int</sub> =0.0671, R <sub>si</sub> <sub>gma</sub> =0.0540]         | 5019[R <sub>int</sub> =0.0403, R <sub>si</sub> <sub>gma</sub> =0.0314]         | 18384[R <sub>int</sub> =0.0526, R <sub>s</sub> <sub>igma</sub> =0.0256]           |
| GOF                                         | 1.069                                                                          | 1.027                                                                          | 1.012                                                                          | 1.088                                                                          | 1.009                                                                             |
| Final R indexes [I≥2σ(I)]                   | R <sub>1</sub> =0.0787, wR <sub>2</sub> =0.1995                                | R <sub>1</sub> =0.0783, wR <sub>2</sub> =0.2078                                | R <sub>1</sub> =0.0614, wR <sub>2</sub> =0.1589                                | R <sub>1</sub> =0.0588, wR <sub>2</sub> =0.1596                                | R <sub>1</sub> =0.0721, wR <sub>2</sub> =0.1981                                   |
| Final R indexes [all data]                  | R <sub>1</sub> =0.0877, wR <sub>2</sub> =0.2074                                | R <sub>1</sub> =0.0985, wR <sub>2</sub> =0.2294                                | R <sub>1</sub> =0.0920, wR <sub>2</sub> =0.1872                                | R <sub>1</sub> =0.0731, wR <sub>2</sub> =0.1716                                | R <sub>1</sub> =0.0811, wR <sub>2</sub> =0.2103                                   |
| Largest diff. peak/hole / e Å <sup>-3</sup> | 1.16/-0.75                                                                     | 2.04/-0.52                                                                     | 0.59/-0.48                                                                     | 1.23/-0.54                                                                     | 1.79/-0.97                                                                        |

$$R_1 = (\sum ||F_o| - |F_c|| / \sum |F_o|), wR_2 = [\sum (w(F_o^2 - F_c^2)^2) / \sum (w|F_o^2|)]^{1/2}$$

Table S3. Selected bond distances (Å) and bond angles (°) of compounds **1-5**.

| 1                                                  | 2                                                  | 3                                                  | 4                                                  | 5                                                  |
|----------------------------------------------------|----------------------------------------------------|----------------------------------------------------|----------------------------------------------------|----------------------------------------------------|
| Mn1-Cl1=2.3407(9)                                  | Mn1-Cl1=2.3926(8)                                  | Mn1-O11=2.103(3)                                   | Mn1-Br1=2.5420(5)                                  | Mn1-O11=2.202(3)                                   |
| Mn1-O11=2.063(2)                                   | Mn1-O11=2.030(2)                                   | Mn1-O13 <sup>3</sup> =2.158(3)                     | Mn1-O11=2.160(2)                                   | Mn1-O13 <sup>3</sup> =2.129(2)                     |
| Mn1-O13 <sup>1</sup> =2.066(2)                     | Mn1-O13 <sup>1</sup> =2.143(2)                     | Mn1-O22=2.217(2)                                   | Mn1-O12=2.418(2)                                   | Mn1-O21=2.151(3)                                   |
| Mn1-O21=2.442(2)                                   | Mn1-O14 <sup>1</sup> =2.480(2)                     | Mn2-Br1=2.4919(7)                                  | Mn1-O13 <sup>1</sup> =2.037(2)                     | Mn2-Br1=2.5514(6)                                  |
| Mn1-O22=2.173(2)                                   | Mn1-O22 <sup>2</sup> =2.057(2)                     | Mn2-O12 <sup>1</sup> =2.065(3)                     | Mn1-O21=2.069(2)                                   | Mn2-O11 <sup>4</sup> =2.487(3)                     |
| Mn2-O12=2.1078(19)                                 | Mn2-O12=2.136(2)                                   | Mn2-O14 <sup>3</sup> =2.071(3)                     | Mn2-O12=2.193(2)                                   | Mn2-O12 <sup>4</sup> =2.141(3)                     |
| Mn2-O14 <sup>1</sup> =2.148(2)                     | Mn2-O14 <sup>1</sup> =2.198(2)                     | Mn2-O21=2.409(3)                                   | Mn2-O14 <sup>1</sup> =2.132(2)                     | Mn2-O14=2.046(3)                                   |
| Mn2-O22=2.2246(19)                                 | Mn2-O21=2.148(2)                                   | Mn2-O22=2.179(3)                                   | Mn2-O22=2.154(2)                                   | Mn2-O22 <sup>4</sup> =2.090(3)                     |
| Cl1-Mn1-O21=92.73(7)                               | Cl1-Mn1-O14 <sup>1</sup> =148.48(6)                | O11-Mn1-O11 <sup>1</sup> =180.000(1)               | Br1-Mn1-Cl17=124.11(7)                             | O11 <sup>1</sup> -Mn1-O11=180.0(2)                 |
| O11-Mn1-Cl1=102.87(7)                              | O11-Mn1-Cl1=108.29(6)                              | O11-Mn1-O13 <sup>2</sup> =93.62(13)                | O11-Mn1-Br1=96.99(6)                               | O13 <sup>3</sup> -Mn1-O11=88.96(11)                |
| O11-Mn1-O13 <sup>1</sup> =106.57(10)               | O11-Mn1-O13 <sup>1</sup> =99.82(11)                | O11-Mn1-O13 <sup>3</sup> =86.38(13)                | O11-Mn1-O12=56.38(8)                               | O13 <sup>2</sup> -Mn1-O11=91.04(11)                |
| O11-Mn1-O21=147.78(8)                              | O11-Mn1-O14 <sup>1</sup> =94.18(8)                 | O11 <sup>1</sup> -Mn1-O22=88.25(10)                | O12-Mn1-Br1=149.58(5)                              | O13 <sup>2</sup> -Mn1-O13 <sup>3</sup> =180.00(11) |
| O11-Mn1-O22=91.76(8)                               | O11-Mn1-O22 <sup>2</sup> =126.08(11)               | O11-Mn1-O22=91.75(10)                              | O13 <sup>1</sup> -Mn1-Br1=106.08(6)                | O13 <sup>2</sup> -Mn1-O21=88.96(11)                |
| O13 <sup>1</sup> -Mn1-Cl1=109.39(7)                | O13 <sup>1</sup> -Mn1-Cl1=97.92(6)                 | O13 <sup>2</sup> -Mn1-O13 <sup>3</sup> =180.0      | O13 <sup>1</sup> -Mn1-O11=100.01(11)               | O13 <sup>3</sup> -Mn1-O21=91.04(11)                |
| O13 <sup>1</sup> -Mn1-O21=94.18(9)                 | O13 <sup>1</sup> -Mn1-O14 <sup>1</sup> =55.59(7)   | O13 <sup>3</sup> -Mn1-O22=86.69(11)                | O13 <sup>1</sup> -Mn1-O12=93.99(9)                 | O21-Mn1-O11=84.06(12)                              |
| O13 <sup>1</sup> -Mn1-O22=117.42(8)                | O22 <sup>2</sup> -Mn1-Cl1=95.59(7)                 | O13 <sup>2</sup> -Mn1-O22=93.31(11)                | O13 <sup>1</sup> -Mn1-O21=127.82(11)               | O21 <sup>1</sup> -Mn1-O11=95.94(12)                |
| O22-Mn1-Cl1=124.11(6)                              | O22 <sup>2</sup> -Mn1-O13 <sup>1</sup> =124.36(11) | O22 <sup>1</sup> -Mn1-O22=180.000(1)               | O21-Mn1-Br1=95.67(7)                               | O21 <sup>1</sup> -Mn1-O11 <sup>1</sup> =84.06(12)  |
| O22-Mn1-O21=56.44(8)                               | O22 <sup>2</sup> -Mn1-O14 <sup>1</sup> =88.21(9)   | O12 <sup>1</sup> -Mn2-Br1=102.22(9)                | O21-Mn1-O11=124.04(11)                             | O21-Mn1-O11 <sup>1</sup> =95.94(12)                |
| O12 <sup>2</sup> -Mn2-O12=180.00(17)               | O12-Mn2-O12 <sup>2</sup> =180.0                    | O12 <sup>1</sup> -Mn2-O14 <sup>3</sup> =105.78(12) | O21-Mn1-O12=89.44(9)                               | O21-Mn1-O21 <sup>1</sup> =180.00(18)               |
| O12-Mn2-O14 <sup>1</sup> =93.58(10)                | O12 <sup>2</sup> -Mn2-O14 <sup>3</sup> =91.34(10)  | O12 <sup>1</sup> -Mn2-O21=148.02(11)               | O12-Mn2-O12 <sup>2</sup> =180.00(12)               | O11 <sup>4</sup> -Mn2-Br1=151.88(7)                |
| O12-Mn2-O14 <sup>3</sup> =86.42(10)                | O12-Mn2-O14 <sup>3</sup> =88.66(9)                 | O12 <sup>1</sup> -Mn2-O22=91.66(11)                | O14 <sup>3</sup> -Mn2-O12=88.17(9)                 | O12 <sup>4</sup> -Mn2-Br1=98.59(7)                 |
| O12 <sup>2</sup> -Mn2-O22=91.32(8)                 | O12-Mn2-O14 <sup>1</sup> =91.34(9)                 | O14 <sup>3</sup> -Mn2-Br1=109.28(9)                | O14 <sup>1</sup> -Mn2-O12=91.83(9)                 | O12 <sup>4</sup> -Mn2-O11 <sup>4</sup> =55.46(9)   |
| O12-Mn2-O22=88.68(8)                               | O12-Mn2-O21=90.78(9)                               | O14 <sup>3</sup> -Mn2-O21=95.53(12)                | O14 <sup>3</sup> -Mn2-O14 <sup>1</sup> =180.00(10) | O14-Mn2-Br1=104.11(8)                              |
| O14 <sup>3</sup> -Mn2-O14 <sup>1</sup> =180.00(14) | O14 <sup>3</sup> -Mn2-O14 <sup>1</sup> =180.00(11) | O14 <sup>3</sup> -Mn2-O22=118.39(11)               | O14 <sup>3</sup> -Mn2-O22=90.62(9)                 | O14-Mn2-O11 <sup>4</sup> =92.11(11)                |
| O14 <sup>1</sup> -Mn2-O22=86.47(9)                 | O21-Mn2-O14 <sup>1</sup> =95.35(9)                 | O21-Mn2-Br1=92.59(9)                               | O14 <sup>1</sup> -Mn2-O22=89.38(9)                 | O14-Mn2-O12 <sup>4</sup> =99.79(12)                |
| O14 <sup>3</sup> -Mn2-O22=93.53(9)                 | O21-Mn2-O14 <sup>3</sup> =84.65(9)                 | O22-Mn2-Br1=124.13(7)                              | O22-Mn2-O12=84.36(9)                               | O14-Mn2-O22 <sup>4</sup> =133.06(13)               |
| O22-Mn2-O22 <sup>2</sup> =180.00(13)               | O21 <sup>2</sup> -Mn2-O21=180.00(12)               | O22-Mn2-O21=56.88(10)                              | O22 <sup>2</sup> -Mn2-O22=180.0                    | O22 <sup>4</sup> -Mn2-Br1=94.43(9)                 |

Symmetry code: **1**): 1/2+X, -1/2-Y, 1/2+Z; **2**): 1-X, -Y, -Z; **3**): 1/2-X, 1/2+Y, -1/2-Z; **4**): 1-X, 5/2-Y, 1/2+Z; **5**): 1-X, 2-Y, -Z; **6**): 1-X, 1-Y, 1-Z; **7**): 1/2+X, 1/2-Y, 1/2+Z; **8**): 1/2-X, 1/2+Y, 1/2-Z; **9**): 1-X, 5/2-Y, -1/2+Z; **10**): 1-X, 2-Y, -Z; **11**): 1/2+Y, 1/2-Z; **12**): 1-X, 1-Y, 1-Z; **13**): 1-X, 1/2-Y, 1/2+Z; **14**): 1/2-X, 1/2+Y, 1/2-Z; **15**): 1-X, 5/2-Y, -1/2+Z; **16**): 1-X, 2-Y, -Z; **17**): 1/2+Y, 1/2-Z; **18**): 1-X, -Y, -Z; **19**): 1-X, 1/2-Y, -1/2+Z; **20**): 1-X, -1/2+Y, 1/2-Z; **21**): 1-X, 1/2-Y, 1/2+Z.

Table S4. Selected bond distances (Å) and bond angles (°) of compounds **6-9**.

| 6                                | 7                                                | 8                                   | 9                                   |
|----------------------------------|--------------------------------------------------|-------------------------------------|-------------------------------------|
| Mn1-O11=2.2588(11)               | Mn1-O11 <sup>1</sup> =2.1356(13)                 | Mn1-O11=2.1168(11)                  | Mn1-O11=2.136(2)                    |
| Mn1-O12=2.2583(14)               | Mn1-O12=2.1488(11)                               | Mn1-O21 <sup>1</sup> =2.1504(10)    | Mn1-O12 <sup>1</sup> =2.149(2)      |
| Mn1-O21 <sup>1</sup> =2.1021(12) | Mn1-O21 <sup>2</sup> =2.1230(13)                 | Mn1-O22 <sup>2</sup> =2.1275(11)    | Mn1-O21 <sup>2</sup> =2.123(3)      |
| Mn1-O31=2.3534(16)               | Mn1-O31=2.2258(13)                               | Mn1-O31=2.2210(11)                  | Mn1-O31=2.228(2)                    |
| Mn1-O32=2.1692(13)               | Mn1-O1W=2.1770(12)                               | Mn1-O1W=2.2880(8)                   | Mn1-O1W=2.185(2)                    |
| Mn1-O41 <sup>2</sup> =2.0655(15) | Mn1-O2W=2.2876(10)                               | Mn1-O2W=2.1770(11)                  | Mn1-O2W=2.2943(18)                  |
| Mn2-O11=2.1534(10)               | O11 <sup>1</sup> -Mn1-O12=94.64(5)               | O11-Mn1-O21 <sup>1</sup> =172.17(4) | O11-Mn1-O12 <sup>1</sup> =93.89(10) |
| Mn2-O22 <sup>1</sup> =2.1204(13) | O11 <sup>1</sup> -Mn1-O21 <sup>2</sup> =91.13(5) | O11-Mn1-O22 <sup>2</sup> =91.57(4)  | O11-Mn1-O31=177.99(9)               |
| Mn2-O51=2.2678(12)               | O11 <sup>1</sup> -Mn1-O31=178.60(4)              | O11-Mn1-O31=90.24(4)                | O11-Mn1-O1W=90.26(9)                |

|                                                   |                                     |                                                  |                                                    |
|---------------------------------------------------|-------------------------------------|--------------------------------------------------|----------------------------------------------------|
| O11-Mn1-O31=93.46(5)                              | O11 <sup>1</sup> -Mn1-O1W=90.41(5)  | O11-Mn1-O1W=88.00(4)                             | O11-Mn1-O2W=88.61(8)                               |
| O12-Mn1-O11=57.44(4)                              | O11 <sup>1</sup> -Mn1-O2W=89.22(4)  | O11-Mn1-O2W=95.15(4)                             | O12 <sup>1</sup> -Mn1-O31=84.32(9)                 |
| O12-Mn1-O31=87.91(6)                              | O12-Mn1-O31=84.14(5)                | O21 <sup>1</sup> -Mn1-O31=83.90(4)               | O12 <sup>1</sup> -Mn1-O1W=90.60(9)                 |
| O21 <sup>1</sup> -Mn1-O11=98.34(4)                | O12-Mn1-O1W=90.95(5)                | O21 <sup>1</sup> -Mn1-O1W=86.84(4)               | O12 <sup>1</sup> -Mn1-O2W=86.62(8)                 |
| O21 <sup>1</sup> -Mn1-O12=155.77(5)               | O12-Mn1-O2W=86.53(4)                | O21 <sup>1</sup> -Mn1-O2W=90.13(4)               | O21 <sup>2</sup> -Mn1-O11=91.43(10)                |
| O21 <sup>1</sup> -Mn1-O31=94.51(6)                | O21 <sup>2</sup> -Mn1-O12=172.29(5) | O22 <sup>2</sup> -Mn1-O21 <sup>1</sup> =94.20(4) | O21 <sup>2</sup> -Mn1-O12 <sup>1</sup> =171.91(10) |
| O21 <sup>1</sup> -Mn1-O32=95.55(5)                | O21 <sup>2</sup> -Mn1-O31=90.03(5)  | O22 <sup>2</sup> -Mn1-O31=177.90(3)              | O21 <sup>2</sup> -Mn1-O31=90.25(10)                |
| O32-Mn1-O11=148.23(5)                             | O21 <sup>2</sup> -Mn1-O1W=94.13(5)  | O22 <sup>2</sup> -Mn1-O1W=88.69(4)               | O21 <sup>2</sup> -Mn1-O1W=95.47(10)                |
| O32-Mn1-O12=105.83(5)                             | O21 <sup>2</sup> -Mn1-O2W=88.43(5)  | O22 <sup>2</sup> -Mn1-O2W=90.13(4)               | O21 <sup>2</sup> -Mn1-O2W=87.42(10)                |
| O32-Mn1-O31=56.94(6)                              | O31-Mn1-O2W=90.03(4)                | O31-Mn1-O1W=90.31(3)                             | O31-Mn1-O2W=90.36(7)                               |
| O41 <sup>2</sup> -Mn1-O11=114.97(5)               | O1W-Mn1-O31=90.28(5)                | O2W-Mn1-O31=90.77(4)                             | O1W-Mn1-O31=90.68(8)                               |
| O41 <sup>2</sup> -Mn1-O12=94.44(6)                | O1W-Mn1-O2W=177.42(4)               | O2W-Mn1-O1W=176.66(4)                            | O1W-Mn1-O2W=176.92(9)                              |
| O41 <sup>2</sup> -Mn1-O21 <sup>1</sup> =96.25(6)  |                                     |                                                  |                                                    |
| O41 <sup>2</sup> -Mn1-O31=147.60(6)               |                                     |                                                  |                                                    |
| O41 <sup>2</sup> -Mn1-O32=91.59(6)                |                                     |                                                  |                                                    |
| O11-Mn2-O11 <sup>3</sup> =100.56(5)               |                                     |                                                  |                                                    |
| O11-Mn2-O51=158.84(4)                             |                                     |                                                  |                                                    |
| O11-Mn2-O51 <sup>3</sup> =100.57(4)               |                                     |                                                  |                                                    |
| O22 <sup>4</sup> -Mn2-O11=93.90(4)                |                                     |                                                  |                                                    |
| O22 <sup>1</sup> -Mn2-O11=84.71(4)                |                                     |                                                  |                                                    |
| O22 <sup>4</sup> -Mn2-O22 <sup>1</sup> =177.83(6) |                                     |                                                  |                                                    |
| O22 <sup>4</sup> -Mn2-O51=86.80(5)                |                                     |                                                  |                                                    |
| O22 <sup>1</sup> -Mn2-O51=95.10(5)                |                                     |                                                  |                                                    |
| O51-Mn2-O51 <sup>3</sup> =58.36(7)                |                                     |                                                  |                                                    |

Symmetry code: **6**): <sup>1</sup> 1/2+X, 5/2-Y, -1/2+Z; <sup>2</sup> X, 1+Y, Z; <sup>3</sup> 1-X, Y, -1/2-Z; <sup>4</sup> 1/2-X, 5/2-Y, -Z; **7**): <sup>1</sup> -X, Y, -Z; <sup>2</sup> 1/2+X, 1/2-Y, 1+Z; **8**): <sup>1</sup> 1/2+X, 1/2-Y, 1+Z; <sup>2</sup> 1/2-X, 1/2-Y, -Z; **9**): <sup>1</sup> -X, Y, -Z; <sup>2</sup> 1/2-X, 1/2-Y, 1-Z; <sup>3</sup> -X, Y, -1-Z; <sup>4</sup> X, 1-Y, Z.

Table S5. Selected bond distances (Å) and bond angles (°) of compound **11**.

|                                |                                                   |                                                   |
|--------------------------------|---------------------------------------------------|---------------------------------------------------|
| Mn1-O31=2.209(3)               | O92-Mn1-O31 <sup>1</sup> =92.63(11)               | O72-Mn3-O132=102.0(2)                             |
| Mn1-O31 <sup>1</sup> =2.209(3) | O92-Mn1-O31=87.37(11)                             | O132-Mn3-O61 <sup>3</sup> =154.0(3)               |
| Mn1-O92 <sup>1</sup> =2.200(3) | O111-Mn1-O31=93.39(15)                            | O132-Mn3-O131=49.0(3)                             |
| Mn1-O92=2.200(3)               | O111-Mn1-O31 <sup>1</sup> =86.61(15)              | O32-Mn4-O31=57.73(13)                             |
| Mn1-O111=2.120(3)              | O111-Mn1-O92 <sup>1</sup> =92.52(14)              | O32-Mn4-O81 <sup>4</sup> =117.9(2)                |
| Mn2-O12=2.140(3)               | O111-Mn1-O92=87.48(14)                            | O81 <sup>4</sup> -Mn4-O31=170.32(15)              |
| Mn2-O22 <sup>2</sup> =2.170(3) | O12-Mn2-O22 <sup>2</sup> =174.03(13)              | O82 <sup>4</sup> -Mn4-O31=112.90(15)              |
| Mn2-O52=2.235(3)               | O12-Mn2-O52=88.98(13)                             | O82 <sup>4</sup> -Mn4-O32=89.23(16)               |
| Mn2-O61 <sup>3</sup> =2.247(3) | O12-Mn2-O61 <sup>3</sup> =97.47(13)               | O82 <sup>4</sup> -Mn4-O81 <sup>4</sup> =57.51(17) |
| Mn2-O71=2.140(3)               | O12-Mn2-O71=89.68(13)                             | O91 <sup>1</sup> -Mn4-O31=87.15(14)               |
| Mn2-O121=2.099(3)              | O22 <sup>2</sup> -Mn2-O52=88.97(11)               | O91 <sup>1</sup> -Mn4-O32=143.64(17)              |
| Mn3-O11=2.077(3)               | O22 <sup>2</sup> -Mn2-O61 <sup>3</sup> =84.85(11) | O91 <sup>1</sup> -Mn4-O81 <sup>4</sup> =95.1(2)   |
| Mn3-O61 <sup>3</sup> =2.321(3) | O52-Mn2-O61 <sup>3</sup> =173.08(11)              | O91 <sup>1</sup> -Mn4-O82 <sup>4</sup> =97.12(15) |
| Mn3-O62 <sup>3</sup> =2.195(4) | O71-Mn2-O22 <sup>2</sup> =84.78(12)               | O91 <sup>1</sup> -Mn4-O112=101.23(18)             |
| Mn3-O72=2.066(4)               | O71-Mn2-O52=91.96(11)                             | O112-Mn4-O31=103.03(13)                           |
| Mn3-O131=2.428(4)              | O71-Mn2-O61 <sup>3</sup> =90.58(11)               | O112-Mn4-O32=96.16(19)                            |
| Mn3-O132=2.207(6)              | O121-Mn2-O12=88.16(15)                            | O112-Mn4-O81 <sup>4</sup> =85.78(17)              |

|                                |                                                   |                                       |
|--------------------------------|---------------------------------------------------|---------------------------------------|
| Mn4-O31=2.312(4)               | O121-Mn2-O22 <sup>2</sup> =97.49(14)              | O112-Mn4-O82 <sup>4</sup> =140.23(17) |
| Mn4-O32=2.227(4)               | O121-Mn2-O52=91.16(12)                            | O21 <sup>2</sup> -Mn5-O51=94.29(15)   |
| Mn4-O81 <sup>4</sup> =2.304(5) | O121-Mn2-O61 <sup>3</sup> =86.56(12)              | O21 <sup>2</sup> -Mn5-O52=106.60(12)  |
| Mn4-O82 <sup>4</sup> =2.173(4) | O121-Mn2-O71=176.16(14)                           | O21 <sup>2</sup> -Mn5-O101=148.33(14) |
| Mn4-O91 <sup>1</sup> =2.056(3) | O11-Mn3-O61 <sup>3</sup> =102.95(14)              | O21 <sup>2</sup> -Mn5-O102=92.73(14)  |
| Mn4-O112=2.072(4)              | O11-Mn3-O62 <sup>3</sup> =94.09(16)               | O21 <sup>2</sup> -Mn5-O122=101.46(17) |
| Mn5-O21 <sup>2</sup> =2.085(3) | O11-Mn3-O131=145.8(2)                             | O52-Mn5-O51=57.19(11)                 |
| Mn5-O51=2.377(3)               | O11-Mn3-O132=96.9(3)                              | O52-Mn5-O101=98.48(12)                |
| Mn5-O52=2.211(3)               | O61 <sup>3</sup> -Mn3-O131=109.47(19)             | O101-Mn5-O51=83.17(15)                |
| Mn5-O101=2.323(4)              | O62 <sup>3</sup> -Mn3-O61 <sup>3</sup> =57.75(12) | O102-Mn5-O51=105.09(16)               |
| Mn5-O102=2.186(4)              | O62 <sup>3</sup> -Mn3-O131=94.2(2)                | O102-Mn5-O52=153.98(14)               |
| Mn5-O122=2.091(4)              | O62 <sup>3</sup> -Mn3-O132=104.6(2)               | O102-Mn5-O101=58.08(14)               |
|                                | O72-Mn3-O11=95.30(15)                             | O122-Mn5-O51=152.18(15)               |
|                                | O72-Mn3-O61 <sup>3</sup> =92.82(13)               | O122-Mn5-O52=96.06(14)                |
|                                | O72-Mn3-O62 <sup>3</sup> =150.45(14)              | O122-Mn5-O101=94.66(16)               |
|                                | O72-Mn3-O131=93.58(18)                            | O122-Mn5-O102=96.98(17)               |

Symmetry code: <sup>1</sup> -X, 1-Y, -Z; <sup>2</sup> X, -1+Y, Z; <sup>3</sup> 1+X, Y, Z; <sup>4</sup> 1+X, Y, -1+Z.

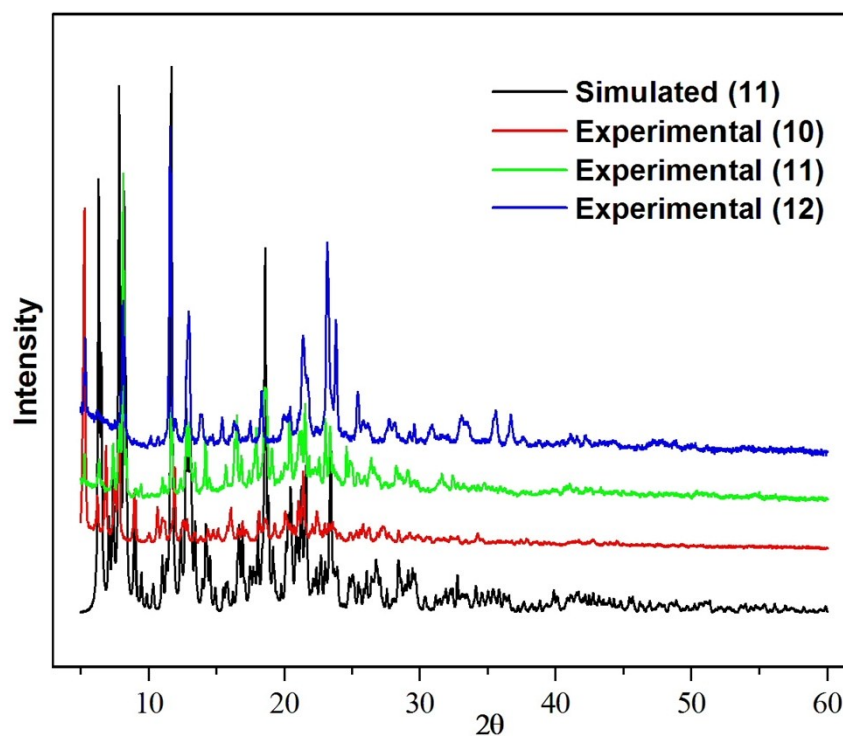

**Fig. S1.** Comparison of PXRD patterns of compounds **10** and **12** to those simulated and experimental PXRD patterns of compound **11**.

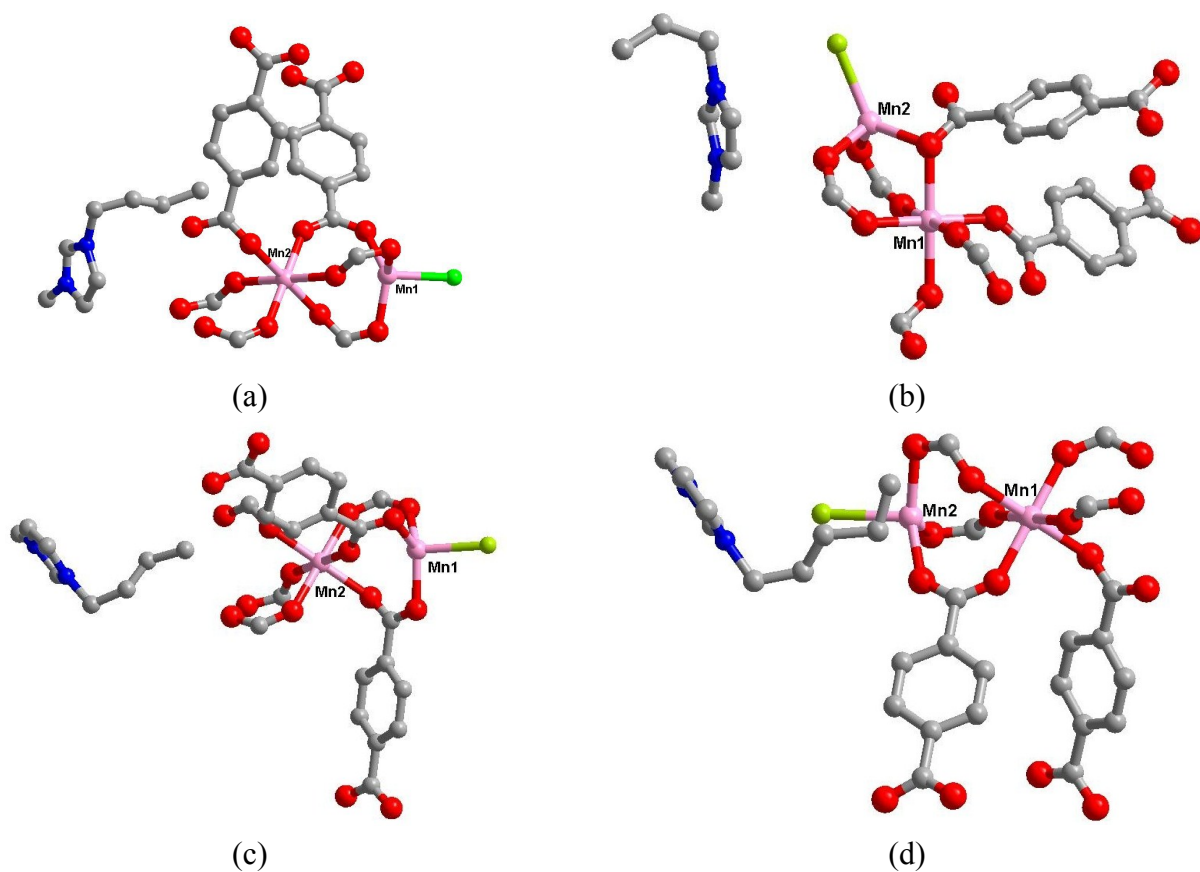

**Fig. S2.** The coordination spheres of Mn(III) centers in compounds **2** (a), **3** (b), **4** (c), and **5** (d).

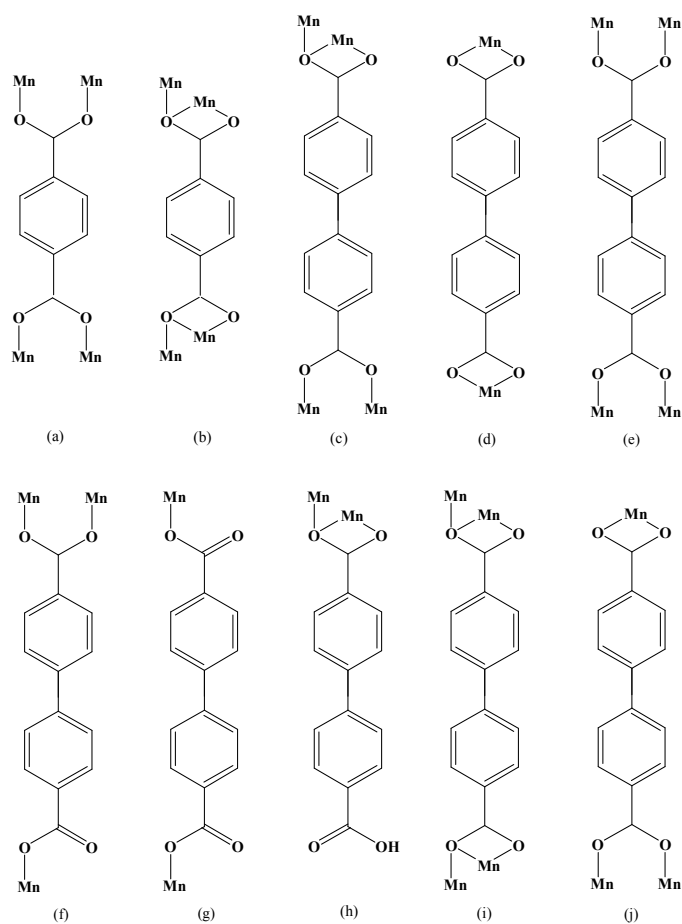

**Scheme S1.** The coordination fashions of

BPDC<sup>2-</sup> and BDC<sup>2-</sup> ligands in compound **1-12**.

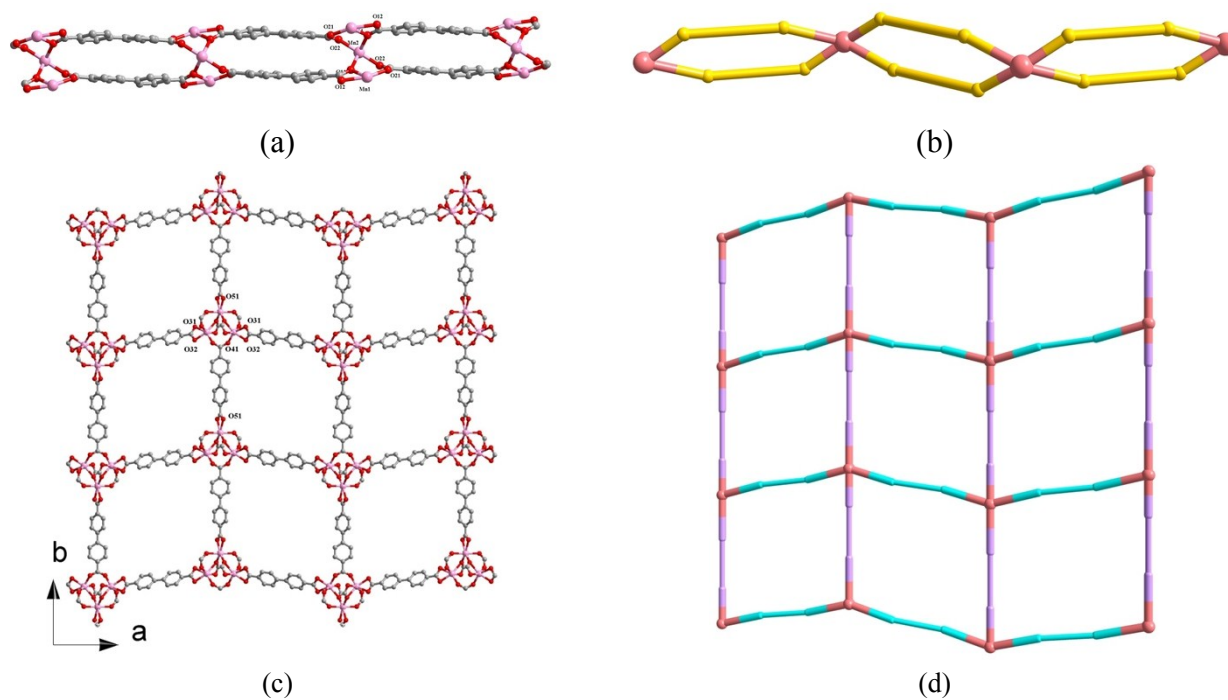

**Fig. S3.** The 1D chain (a) and topological (b) and 2D layer along the *ab*-plane (c) and topological (d) of compound **6**.

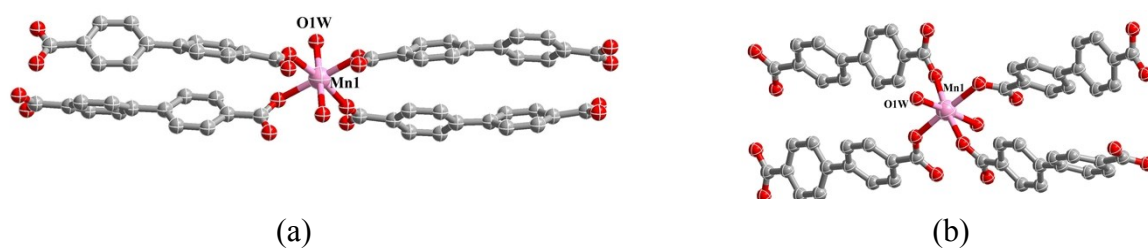

**Fig. S4.** The coordination spheres of Mn(III) centers in compounds **8** (a) and **9** (b).

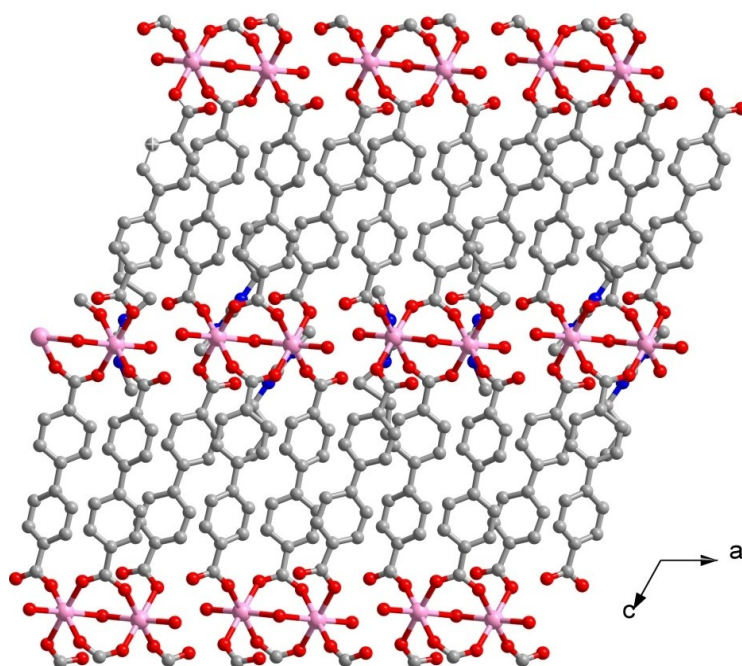

**Fig. S5.** The 2D layer of compound **7**.

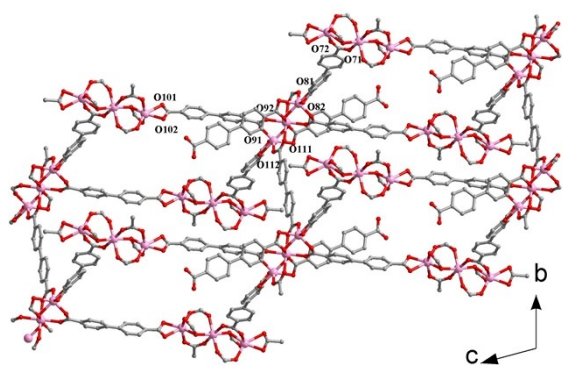

(a)

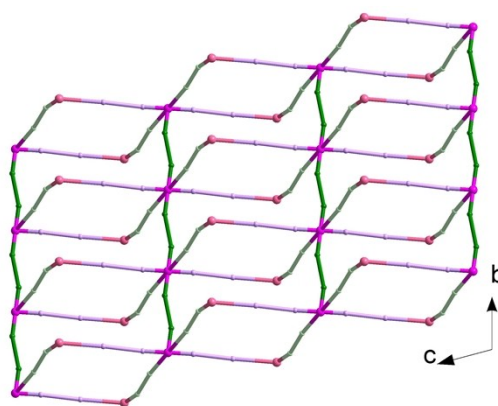

(b)

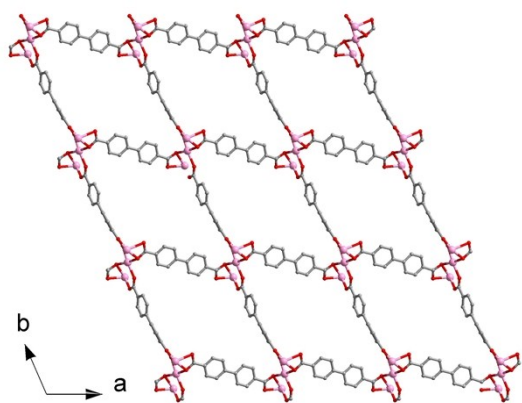

(c)

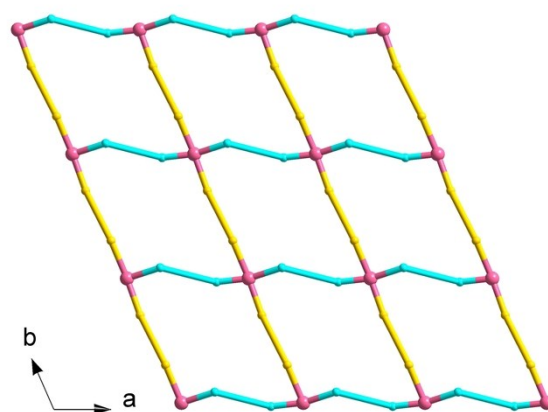

(d)

**Fig. S6.** The 2D layers of compound **11** along the *bc*-plane (a and b) and the *ab*-plane (c and d).

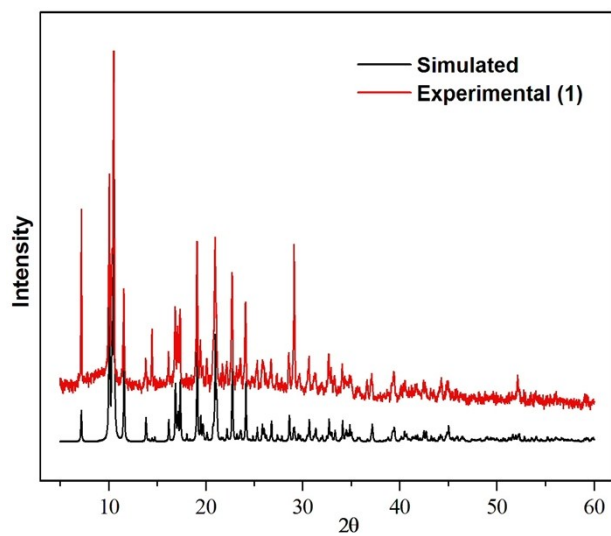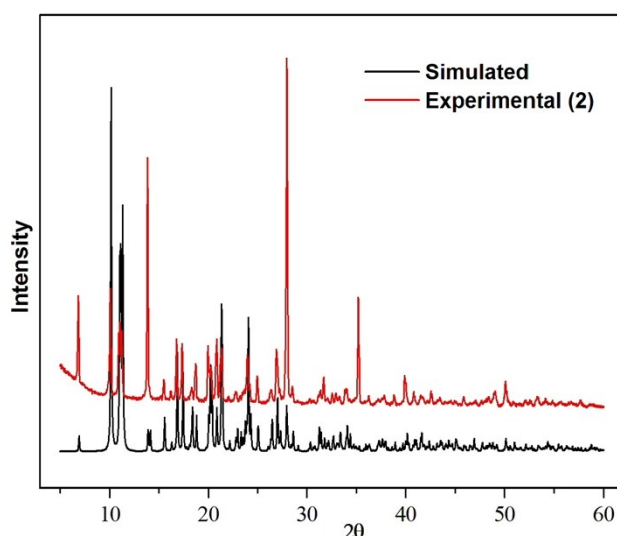



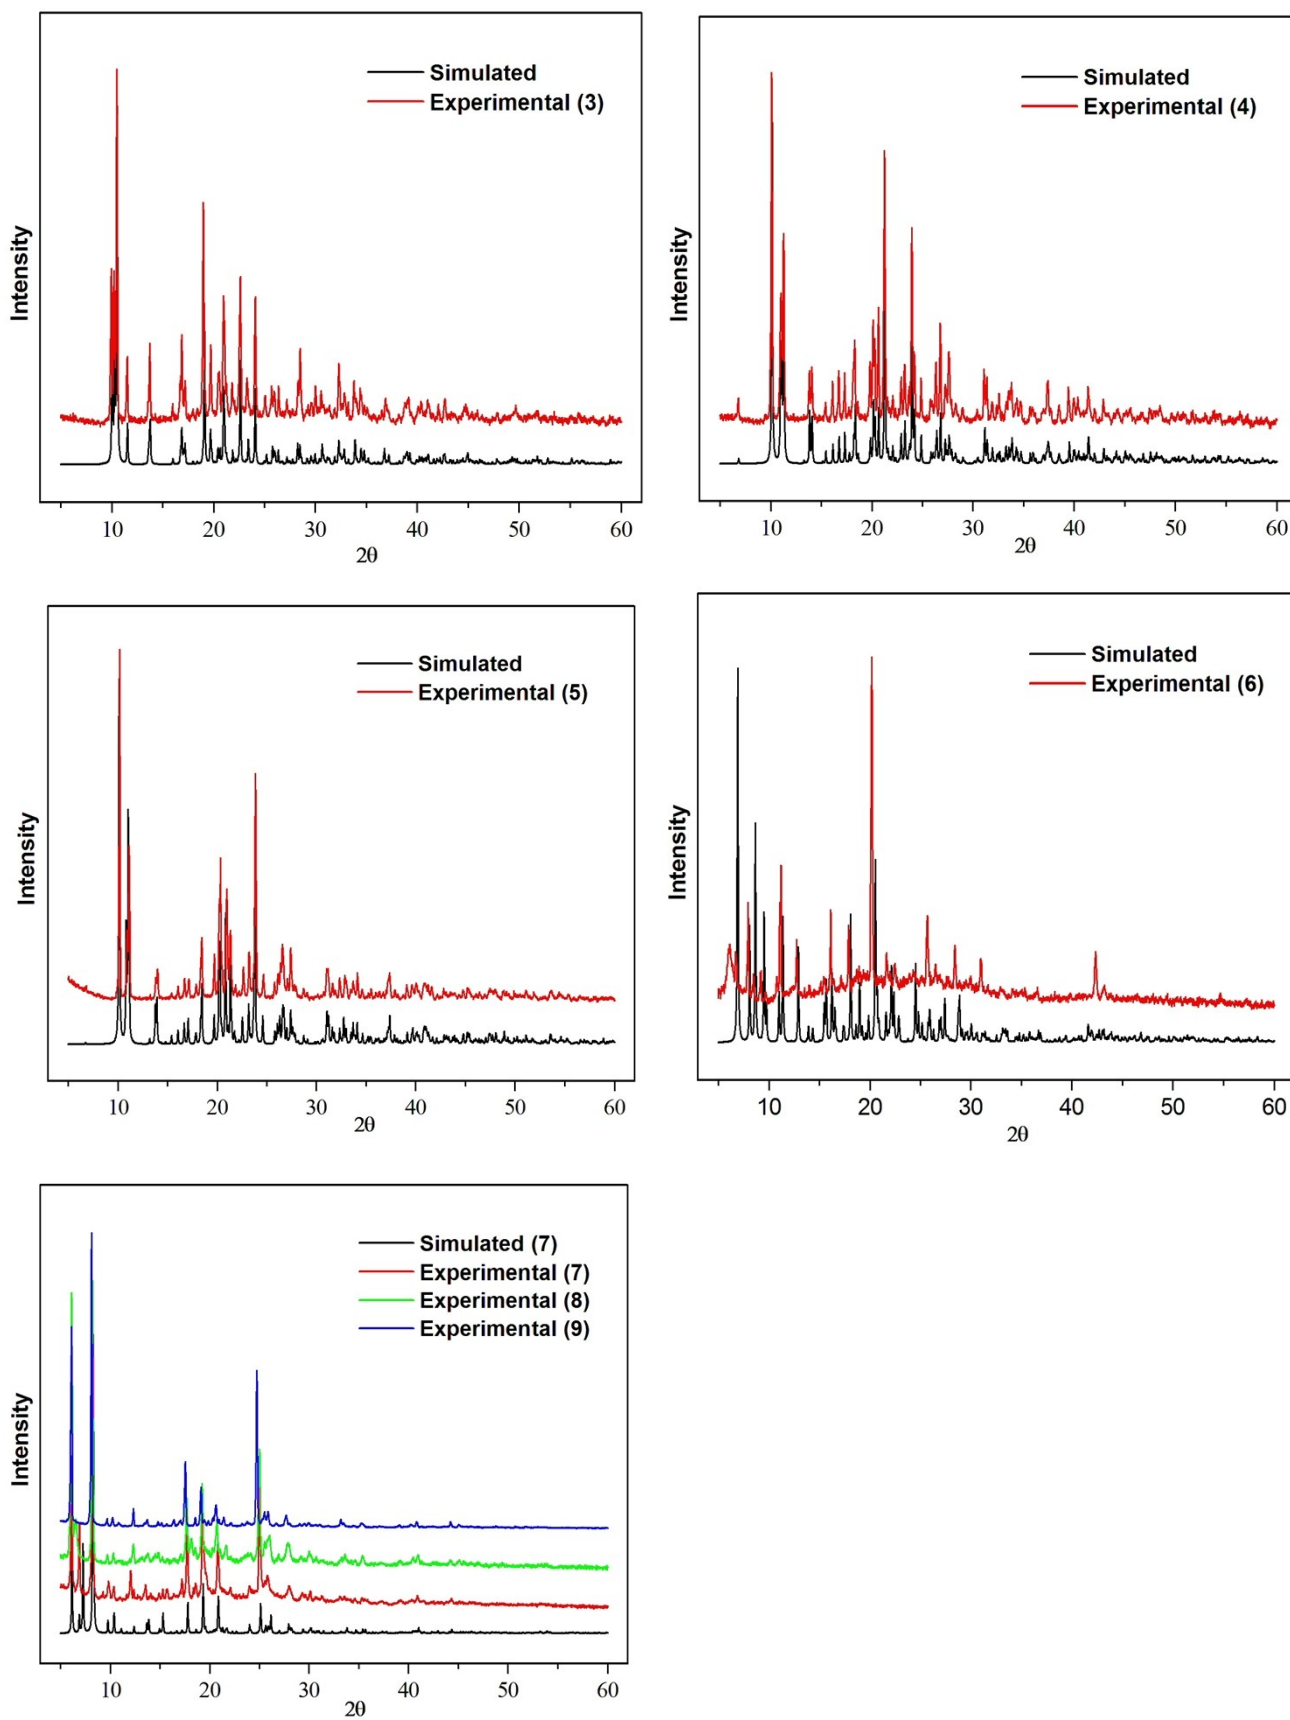

**Fig. S7.** Comparison of PXRD patterns of compounds 1-9 to those simulated from single crystal structure data.

**Table S6.** The main IR characteristic absorption peaks for compounds **1–12**.

| compounds | $\nu_{as}(\text{COO}^-)/\text{cm}^{-1}$ | $\nu_s(\text{COO}^-)/\text{cm}^{-1}$ | $\delta(\text{C}^-$<br>H)(MI)/ $\text{cm}^{-1}$ | $\delta(\text{C}^-$<br>N)(MI)/ $\text{cm}^{-1}$ | $\delta(\text{C-H})/(\text{CH}_3\text{CH}_2)\text{cm}^{-1}$ |
|-----------|-----------------------------------------|--------------------------------------|-------------------------------------------------|-------------------------------------------------|-------------------------------------------------------------|
| <b>1</b>  | 1639, 1563                              | 1506, 1391                           | 3146, 3108                                      | 1167                                            | 2967,2879                                                   |
| <b>2</b>  | 1639, 1559                              | 1501, 1392                           | 3146, 3098                                      | 1165                                            | 2962,2872                                                   |
| <b>3</b>  | 1595, 1567                              | 1501, 1391                           | 3146, 3102                                      | 1171                                            | 2962,2880                                                   |
| <b>4</b>  | 1615, 1569                              | 1501, 1391                           | 3146, 3098                                      | 1159                                            | 2952,2864                                                   |
| <b>5</b>  | 1632, 1559                              | 1508, 1391                           | 3146, 3090                                      | 1159                                            | 2960,2860                                                   |
| <b>6</b>  | 1699, 1577                              | 1523, 1391                           | 3154, 3102                                      | 1165                                            | 2980, 2931                                                  |
| <b>7</b>  | 1717,1581                               | 1532, 1391                           | 3140, 3106                                      | 1169                                            | 2968, 2880                                                  |
| <b>8</b>  | 1707,1587                               | 1535, 1393                           | 3152, 3110                                      | 1169                                            | 2960, 2936                                                  |
| <b>9</b>  | 1628, 1585                              | 1537, 1391                           | 3154, 3102                                      | 1166                                            | 2958, 2928                                                  |
| <b>10</b> | 1714, 1605                              | 1534, 1397                           | 3154, 3114                                      | 1172                                            | 2966, 2928                                                  |
| <b>11</b> | 1713, 1605                              | 1541, 1396                           | 3146, 3106                                      | 1172                                            | 2960, 2928                                                  |
| <b>12</b> | 1687, 1604                              | 1536, 1396                           | 3146, 3106                                      | 1170                                            | 2960, 2928                                                  |
